# Supplementary material
Source: PubMed Central journal article supplement (PMC7376550)
Supplement: AEM.00702-20-s0001.pdf [file AEM.00702-20-s0001.pdf]

## Supplementary Material

**Table S1 The vaccination dose and coverage rate for routine immunization and SIAs in Shandong province, China (1991-2018)**

| Year | Routine immunization |                  |               | SIAs                |                  |               |
|------|----------------------|------------------|---------------|---------------------|------------------|---------------|
|      | Eligible population  | Vaccination dose | Coverage rate | Eligible population | Vaccination dose | Coverage rate |
| 1991 | 4963356              | 4943503          | 99.6%         | 17991128            | 17507393         | 97.3%         |
| 1992 | 3679429              | 3612831          | 98.2%         | 9445685             | 9298759          | 98.4%         |
| 1993 | 3397239              | 3396230          | 100%          | 7694550             | 7555522          | 98.2%         |
| 1994 | 3369687              | 3359925          | 99.7%         | 8062332             | 7997409          | 99.2%         |
| 1995 | 3188024              | 3168886          | 99.4%         | 6703688             | 6654690          | 99.3%         |
| 1996 | 3063623              | 3054749          | 99.7%         | 6034310             | 5981392          | 99.1%         |
| 1997 | 3152654              | 3145098          | 99.8%         | 5925780             | 5857718          | 98.9%         |
| 1998 | 3235987              | 3223053          | 99.6%         | 6160081             | 6103068          | 99.1%         |
| 1999 | 3097252              | 3083622          | 99.6%         | 6510075             | 6442053          | 99.0%         |
| 2000 | 3211279              | 3155402          | 98.3%         | 6615908             | 6525967          | 98.6%         |
| 2001 | 3287854              | 3273509          | 99.6%         | 5938963             | 5848582          | 98.5%         |
| 2002 | 3138886              | 3114734          | 99.2%         | 4722127             | 4644817          | 98.4%         |
| 2003 | 3097707              | 3068219          | 99.0%         | 5887555             | 5759924          | 97.8%         |
| 2004 | 3196160              | 3163464          | 99.0%         | 5878096             | 5747759          | 97.8%         |
| 2005 | 3606112              | 3572830          | 99.1%         | 5391024             | 5274767          | 97.8%         |
| 2006 | 3575821              | 3551474          | 99.3%         | 7140511             | 6984315          | 97.8%         |
| 2007 | 3767760              | 3745171          | 99.4%         | 7180721             | 7037546          | 98.0%         |
| 2008 | 4129054              | 4105660          | 99.4%         | 5529223             | 5366698          | 97.1%         |
| 2009 | 4234663              | 4217728          | 99.6%         | 2599329             | 2552553          | 98.2%         |
| 2010 | 4187263              | 4174042          | 99.7%         | 5181785             | 5027568          | 97.0%         |
| 2011 | 4556483              | 4524604          | 99.3%         | 6432323             | 6286781          | 97.7%         |
| 2012 | 4675651              | 4666707          | 99.8%         | 3851082             | 3782058          | 98.2%         |
| 2013 | 4485946              | 4479163          | 99.8%         | 7830934             | 7621045          | 97.3%         |
| 2014 | 4806676              | 4797475          | 99.8%         | 2765569             | 2694980          | 97.4%         |
| 2015 | 4924645              | 4913333          | 99.8%         | 3185387             | 3082761          | 96.8%         |
| 2016 | 5064175              | 5050670          | 99.7%         | -                   | -                | -             |
| 2017 | 6176578              | 6129542          | 99.2%         | -                   | -                | -             |
| 2018 | 6047072              | 6030798          | 99.7%         | -                   | -                | -             |

Abbreviation: SIAs, Supplementary immunization activities.

**Table S2 Indicators of AFP surveillance and poliomyelitis laboratory in Shandong province, China (1991-2018)**

| Total reported cases | Non-polio AFP rate <sup>a</sup><br>(≥1.0) | Reporting rate <sup>b</sup><br>(≥80%) | Investigation rate <sup>c</sup><br>(≥80%) | % with adequate specimens <sup>d</sup><br>(≥80%) | Stool inspection rate <sup>e</sup><br>(≥80%) | Stool culture rate <sup>f</sup><br>(≥80%) | Adequate laboratory results rate <sup>g</sup><br>(≥80%) | Positive-stool inspection rate <sup>h</sup><br>(≥80%) | Follow-up AFP rate <sup>i</sup><br>(%) | NPEV typed <sup>j</sup><br>(%) |       |
|----------------------|-------------------------------------------|---------------------------------------|-------------------------------------------|--------------------------------------------------|----------------------------------------------|-------------------------------------------|---------------------------------------------------------|-------------------------------------------------------|----------------------------------------|--------------------------------|-------|
| 1991                 | 231                                       | 1.1                                   | 27.3                                      | 62.8                                             | 58.9                                         | 36.8                                      | 58.9                                                    | 56.1                                                  | 26.7                                   | 59.6                           | 11.3% |
| 1992                 | 130                                       | 0.6                                   | 44.8                                      | 69.4                                             | 53.5                                         | 41.8                                      | 52.4                                                    | 48.4                                                  | 34.2                                   | 52.4                           | 6.2%  |
| 1993                 | 245                                       | 1.1                                   | 71.6                                      | 82.4                                             | 29.7                                         | 47.4                                      | 23.7                                                    | 8.2                                                   | 20.0                                   | 46.9                           | 6.5%  |
| 1994                 | 405                                       | 1.8                                   | 79.1                                      | 90.6                                             | 56.4                                         | 40.8                                      | 75.5                                                    | 75.8                                                  | 14.3                                   | 64.5                           | 4.4%  |
| 1995                 | 406                                       | 1.9                                   | 93.6                                      | 96.6                                             | 81.2                                         | 60.2                                      | 61.8                                                    | 54.2                                                  | 27.3                                   | 89.5                           | 4.9%  |
| 1996                 | 394                                       | 1.7                                   | 99.2                                      | 97.2                                             | 84.2                                         | 85.8                                      | 87.8                                                    | 84.9                                                  | 80.0                                   | 93.6                           | 5.8%  |
| 1997                 | 353                                       | 2                                     | 88.0                                      | 99.0                                             | 89.0                                         | 93.0                                      | 89.0                                                    | 82.0                                                  | 100                                    | 84.0                           | 13.6% |
| 1998                 | 396                                       | 2.3                                   | 84.8                                      | 98.2                                             | 89.1                                         | 96.5                                      | 95.7                                                    | 89.6                                                  | 100                                    | 91.4                           | 9.8%  |
| 1999                 | 403                                       | 2.4                                   | 88.8                                      | 98.0                                             | 86.6                                         | 94.8                                      | 87.8                                                    | 88.3                                                  | 100                                    | 89.6                           | 3.5%  |
| 2000                 | 395                                       | 2.6                                   | 92.4                                      | 98.0                                             | 89.3                                         | 98.4                                      | 91.2                                                    | 85.8                                                  | 100                                    | 90.1                           | 11.4% |
| 2001                 | 459                                       | 2.9                                   | 90.0                                      | 93.0                                             | 86.1                                         | 94.9                                      | 98.2                                                    | 90.9                                                  | 100                                    | 92.9                           | 8.3%  |
| 2002                 | 384                                       | 2.3                                   | 92.5                                      | 97.2                                             | 89.4                                         | 95.2                                      | 93.9                                                    | 87.3                                                  | 100                                    | 94.8                           | 9.1%  |
| 2003                 | 437                                       | 2.3                                   | 93.9                                      | 94.1                                             | 90.9                                         | 97.9                                      | 94.0                                                    | 92.6                                                  | 100                                    | 92.0                           | 15.6% |
| 2004                 | 443                                       | 2.4                                   | 94.3                                      | 96.9                                             | 89.6                                         | 96.9                                      | 93.4                                                    | 92.9                                                  | 91.7                                   | 94.5                           | 8.8%  |
| 2005                 | 437                                       | 2.4                                   | 96.8                                      | 97.4                                             | 93.6                                         | 95.2                                      | 92.7                                                    | 96.8                                                  | 86.4                                   | 95.9                           | 8.0%  |
| 2006                 | 398                                       | 2.2                                   | 95.2                                      | 97.9                                             | 91.3                                         | 96.4                                      | 95.3                                                    | 95.3                                                  | 85.6                                   | 93.6                           | 13.6% |
| 2007                 | 347                                       | 2                                     | 94.3                                      | 98.6                                             | 92.1                                         | 94.5                                      | 94.3                                                    | 92.3                                                  | 93.8                                   | 95.2                           | 7.5%  |
| 2008                 | 334                                       | 2.4                                   | 95.6                                      | 100                                              | 94.3                                         | 93.7                                      | 94.6                                                    | 90.5                                                  | 91.9                                   | 92.0                           | 13.2% |

|      |     |     |      |      |      |      |      |      |      |      |       |
|------|-----|-----|------|------|------|------|------|------|------|------|-------|
| 2009 | 303 | 2.3 | 94.8 | 99.4 | 90.0 | 89.9 | 95.2 | 95.1 | 87.5 | 91.6 | 12.9% |
| 2010 | 328 | 2.7 | 95.2 | 99.2 | 92.2 | 94.6 | 95.4 | 98.9 | 100  | 94.5 | 11.6% |
| 2011 | 379 | 3   | 96.4 | 98.8 | 89.1 | 97.7 | 96.5 | 93.7 | 100  | 97.3 | 10.8% |
| 2012 | 402 | 2.8 | 95.6 | 100  | 91.1 | 95.1 | 96.8 | 99.6 | 100  | 98.2 | 9.0%  |
| 2013 | 348 | 2.5 | 96.5 | 100  | 92.9 | 94.6 | 98.3 | 99.2 | 100  | 94.1 | 9.2%  |
| 2014 | 357 | 2.5 | 96.7 | 100  | 92.3 | 92.7 | 97.5 | 99.5 | 100  | 94.8 | 11.2% |
| 2015 | 371 | 2.3 | 96.6 | 100  | 92.0 | 96.5 | 98.2 | 100  | 100  | 95.2 | 10.5% |
| 2016 | 389 | 2.5 | 97.2 | 100  | 91.0 | 97.2 | 98.1 | 100  | 100  | 95.8 | 9.5%  |
| 2017 | 352 | 2.2 | 96.8 | 99.7 | 94.0 | 96.4 | 99.3 | 99.2 | 100  | 96.1 | 5.7%  |
| 2018 | 398 | 2.4 | 98.1 | 100  | 94.4 | 97.8 | 99.6 | 100  | 100  | 95.4 | 6.5%  |

Reached or surpass target
  Nearly reached target 0.5-0.99 for non-polio AFP rate, 6-9.9% for NPEV typed, 60-79% for other indicators
  Substantially below target

<sup>a</sup>Number of non-polio AFP cases  $\times$  100,000/total population under 15 years. <sup>b</sup>Percentage of AFP cases with delay between paralysis notification and reporting  $\leq 2$  days. <sup>c</sup>Percentage of AFP cases investigated within two days of reported. <sup>d</sup>Percentage of AFP cases with two stool specimens collected 24 hours apart and within 14 days of paralysis onset. <sup>e</sup>Percentage of AFP cases with two stool specimens sent to the provincial laboratory within 7 days of collection. <sup>f</sup>Percentage of AFP cases with stool specimens cultured for enterovirus isolation within 7 days of receiving samples at laboratory. <sup>g</sup>Percentage of AFP cases with laboratory results  $< 30$  days of receiving samples at laboratory ( $< 14$  days is accepted since 2013). <sup>h</sup>Percentage of enterovirus-positive stool specimen sent to the national laboratory within 60 days. <sup>i</sup>Percentage of AFP cases with follow-up 60 days after the date of paralysis onset. <sup>j</sup>Percentage of AFP cases with NPEV positive in stool specimen.
